1 **Title**

2 **R-Loop Functions in *Brcal*-Associated Mammary Tumorigenesis**

3  
4 **Authors**

5 Huai-Chin Chiang<sup>1</sup>, Leilei Qi<sup>2</sup>, Payal Mitra<sup>1</sup>, Yanfen Hu<sup>2</sup>, Rong Li<sup>1\*</sup>

6  
7  
8 **Affiliations**

9 <sup>1</sup>Department of Biochemistry & Molecular Medicine,

10 <sup>2</sup>Department of Anatomy & Cell Biology

11 School of Medicine & Health Sciences

12 The George Washington University

13 Washington, DC 20037, USA

14  
15 \*Correspondence to: [rli69@gwu.edu](mailto:rli69@gwu.edu) (R.L.)

16  
17  
18  
19  
20  
21  
22  
23  
24  
25  
26  
27  
28  
29  
30  
31  
32  
33  
34  
35

## Abstract

**Excessive R-loops, a DNA-RNA hybrid structure, are associated with genome instability and *BRCA1* mutation-related breast cancer. Yet the causality of R-loops in tumorigenesis remains unclear. Here we show that R-loop removal by *Rnaseh1* overexpression (Rh1-OE) in *Brca1*-knockout (BKO) mouse mammary epithelium exacerbates DNA replication stress without affecting homology-directed DNA repair. R-loop removal also diminishes luminal progenitors, the cell of origin for estrogen receptor  $\alpha$  (ER $\alpha$ )-negative BKO tumors. However, R-loop reduction does not dampen spontaneous BKO tumor incidence. Rather, it gives rise to a significant percentage of ER $\alpha$ -expressing BKO tumors. Thus, R-loops reshape mammary tumor subtype rather than promoting tumorigenesis.**

## Running Title

R-loops reshape *Brca1*-associated tumor subtype

## 36 **Introduction**

37 R-loops, a three-stranded DNA-RNA hybrid structure, consists of an RNA strand  
38 annealed to one strand of a double-stranded DNA molecule and the complementary single-  
39 stranded DNA. R-loops are formed during transcription, DNA replication, and DNA repair  
40 in both prokaryotic and eukaryotic genomes (Brickner et al. 2022; Petermann et al. 2022).  
41 A wealth of evidence implicates R-loops in diverse physiological processes including  
42 transcriptional activation and repression (Boque-Sastre et al. 2015; Grunseich et al. 2018),  
43 DNA replication (Aguilera and Garcia-Muse 2012), immunoglobulin class switch  
44 recombination (Yu et al. 2003), CRISPR-Cas9-mediated DNA editing (Jinek et al. 2012),  
45 and homology-directed repair (HDR) of double strand DNA breaks (DSBs) (Ohle et al.  
46 2016; Ouyang et al. 2021). In addition, R-loops have also been implicated in relieving DNA  
47 topological stress (Chedin and Benham 2020), which otherwise could lead to DNA breaks  
48 (Bacolla and Wells 2004; Zhao et al. 2010). In contrast to the regulatory functions of R-  
49 loops in various DNA transactions, unscheduled R-loop formation is a significant  
50 contributor to DNA replication stress, replication-independent DNA damage, and ultimately  
51 genome instability (Aguilera and Garcia-Muse 2012; Skourti-Stathaki and Proudfoot 2014).  
52 Accordingly, a growing number of proteins have been identified for their roles in prevention  
53 and/or resolution of unscheduled R-loops (Brickner et al. 2022; Petermann et al. 2022).  
54 Indeed, inactivation of these proteins is associated with aberrant R-loop accumulation in  
55 various human diseases including cancers (also see below). Because R-loops are a well-  
56 documented source of genome instability, they are commonly presumed to serve as a driving  
57 force in tumorigenesis. However, to date there is no direct evidence for a causal role of R-  
58 loops in cancer development.

59

60 Women with certain heterozygous germline *BRCA1* mutations (*BRCA1<sup>mut/+</sup>*) have up to  
61 80% lifetime risk of developing breast cancer (Kuchenbaecker et al. 2017). *BRCA1*-  
62 associated breast tumors tend to be basal-like and lack the expression of estrogen receptor  
63  $\alpha$  (ER $\alpha$ ), progesterone receptor, and HER2 (so called “triple-negative”)(Visvader and Stingl  
64 2014). Multiple lines of evidence strongly indicate that luminal progenitor cells of  
65 *BRCA1<sup>mut/+</sup>* breast tissue serve as the cell of origin that gives rise to *BRCA1*-associated  
66 breast tumors (Lim et al. 2009; Molyneux et al. 2010; Proia et al. 2011). These luminal  
67 progenitor cells from precancerous *BRCA1<sup>mut/+</sup>* breast tissue are defective in differentiation  
68 into mature luminal cells (Lim et al. 2009). Furthermore, the expression of luminal  
69 differentiation genes is significantly reduced in *BRCA1<sup>mut/+</sup>* breast epithelium versus non-  
70 mutation carriers (Proia et al. 2011). More recent studies suggest that these differentially  
71 blocked *BRCA1<sup>mut/+</sup>* luminal progenitor cells undergo oncogenesis upon further stimulation  
72 by hormonal and DNA damage-induced signals (Nolan et al. 2017).

73  
74 At the molecular level, the BRCA1 protein is best known for its role in HDR of DSBs  
75 and suppression of DNA replication stress (Chen et al. 2018; Venkitaraman 2019). Cell line-  
76 based studies implicate BRCA1 in R-loop elimination (Bhatia et al. 2014; Hatchi et al.  
77 2015). BRCA1 was also shown to bind directly to DNA-RNA hybrids (D'Alessandro et al.  
78 2018), raising the possibility that BRCA1 may play a role in sensing R-loops. Using clinical  
79 samples and mouse models, our published work showed significant accumulation of R-  
80 loops in luminal epithelial cells harboring *BRCA1* mutations (Zhang et al. 2017).  
81 Furthermore, these *BRCA1* mutation-associated R-loops tend to be localized at  
82 transcriptional enhancers and promoters (Zhang et al. 2017). Collectively, these published  
83 studies clearly indicate a functional link between *BRCA1* mutations and aberrant R-loop

84 accumulation. The prevailing paradigm is that R-loops and their associated genome  
85 instability directly lead to *BRCA1* mutation-associated tumor incidence.

86  
87 To test the hypothesis that aberrant R-loop accumulation observed in *BRCA1*-deficient  
88 luminal epithelial cells directly contribute to *BRCA1*-associated tumorigenesis, we  
89 established a novel transgenic mouse model whereby the mouse *Rnaseh1* gene, encoding  
90 the nuclear form of RNase H1 for R-loop dissolution (Cerritelli and Crouch 2009), is  
91 overexpressed in mammary epithelium with or without *Brcal* deletion. Contrary to the  
92 aforementioned hypothesis, mammary epithelium-specific R-loop removal did not affect  
93 the incidence of spontaneous mammary tumors from *Brcal* mutant mice. However, R-loop  
94 attenuation resets the equilibrium between luminal progenitor and mature luminal cells,  
95 resulting in a significant percentage of ER $\alpha$ <sup>+</sup> *Brcal*-associated mammary tumors. Thus, our  
96 findings provide *in vivo* evidence for a previously unappreciated role of R-loops in *Brcal*-  
97 associated mammary tumor development.

## 99 **Results and Discussion**

### 100 **RNase H1 overexpression attenuates *Brcal*-associated R-loop accumulation in mouse** 101 **mammary epithelium**

102 We previously reported substantial R-loop accumulation in mice with deletion of *Brcal*  
103 in mammary epithelium (*MMTV-Cre*, *Brcal*<sup>fl/fl</sup> or BKO) (Zhang et al. 2017). This mouse  
104 model, commonly used for studying *Brcal*-associated mammary tumor development (Xu  
105 et al. 1999), was chosen to interrogate a causal relationship between R-loops and  
106 tumorigenesis. To attenuate R-loop accumulation in *Brcal*-deficient mammary epithelium,  
107 we first inserted at the Rosa26 locus of the mouse genome a conditional transgenic (Tg)

108 expression cassette for mouse *Rnaseh1*, the mRNA of which is produced only when the  
109 loxP-flanked transcription stop sequence between the promoter and the transgene is  
110 removed through the action of the Cre recombinase (fig. S1A). Through serial breeding with  
111 the *MMTV-Cre* (Wagner et al. 1997) and *Brcal<sup>ff</sup>* strains (Xu et al. 1999), we generated  
112 mammary epithelium-specific *Rnaseh1* transgenic mice (*MMTV-Cre,Rnaseh1<sup>Tg/+</sup>* or Rh1-  
113 OE) and corresponding compound mice with both *Rnaseh1* transgene and *Brcal* deletion  
114 (*MMTV-Cre,Brcal<sup>ff</sup>,Rnaseh1<sup>Tg/+</sup>* or BKO-Rh1-OE). Genotyping confirmed the allelic  
115 status of the floxed *Brcal*, floxed *Rnaseh1*, and Cre-encoding gene (fig. S1B).

116 Immunohistochemistry (IHC) confirmed that RNase H1 was overexpressed in  
117 mammary epithelium of both Rh1-OE and BKO-Rh1-OE mice (Fig. 1A). Due to the lack  
118 of a suitable mouse BRCA1-specific antibody (Yang et al. 2021), we analyzed *Brcal*  
119 mRNA levels in sorted stromal cells (EpCAM<sup>-</sup>CD49f<sup>-</sup>, Vimentin<sup>high</sup>), basal epithelial cells  
120 (EpCAM<sup>med</sup>CD49f<sup>high</sup>, K14<sup>high</sup>), and luminal epithelial cells (EpCAM<sup>high</sup>CD49f<sup>med</sup>, K18<sup>high</sup>)  
121 from various mouse strains (fig. S2A-B). As expected, both BKO and BKO-Rh1-OE mice  
122 exhibited substantially reduced *Brcal* mRNA levels in both basal and luminal epithelial  
123 compartments, but not in the stromal compartment (Fig. 1B). Collectively, these data  
124 ascertain cell type-specific *Brcal* gene deletion and RNase H1 overexpression.

125 Next, we assessed the effect of RNase H1 overexpression on R-loop intensity in mouse  
126 mammary glands. Using the S9.6 antibody that preferentially recognizes DNA-RNA  
127 hybrids (Boguslawski et al. 1986), we detected by immunofluorescence (IF) staining  
128 prominent R-loop signals in BKO, but not control, mammary epithelium (Fig. 1C-D). This  
129 is consistent with our previously reported observation (Zhang et al. 2017). Recent studies  
130 indicate that the same antibody can bind to non-R-loop RNA structures, which could  
131 complicate IF-related data analysis and interpretation (Smolka et al. 2021). To validate the

132 R-loop-specific IF signal in BKO mammary tissues, we pretreated them simultaneously  
133 with RNase T1 and RNase III, which specifically degrade single-stranded RNA (ssRNA)  
134 and double-stranded RNA (dsRNA), respectively (Smolka et al. 2021). The pretreatment  
135 largely eliminated cytoplasmic IF staining but retained the prominent nuclear signals (fig.  
136 S3A). In contrast, pretreatment with RNase H1 abolished the nuclear staining (fig. S3A).  
137 Together, these results confirm specificity of the S9.6 antibody in detection of the R-loop  
138 signals in *Brcal*-deficient mouse mammary epithelium. Notably, *in vivo* RNase H1  
139 overexpression in *Brcal*-deficient mouse mammary epithelium (BKO-Rh1-OE)  
140 significantly diminished the R-loop levels compared to those in BKO (Fig. 1C-D), thus  
141 validating the expected impact of RNase H1 overexpression on R-loops *in vivo*.

### 142 **RNase H1 overexpression does not affect mammary gland development or function**

143 Mammary epithelium-specific *Rnaseh1* transgenic mice (Rh1-OE) were born with no  
144 overt developmental defects (data not shown). The whole-mount staining of the mammary  
145 glands in virgin Rh1-OE mice and postpartum Rh1-OE mice showed normal epithelial  
146 ductal and alveolar structures, respectively (Fig. 2A-B and fig. S3B). Normal alveologensis  
147 and lactogenesis of postpartum Rh1-OE mice were further confirmed by hematoxylin &  
148 eosin (H&E) staining (Fig. 2C) and IHC for anti-milk proteins (Fig. 2D). Moreover, pups  
149 of Rh1-OE dams were properly nursed (data not shown), again indicative of normal  
150 lactating function of the transgenic mice. Therefore, RNase H1 overexpression does not  
151 affect normal mammary gland development or function.

152 Consistent with published findings (Xu et al. 1999; Nair et al. 2016), the mammary  
153 glands of virgin *Brcal*-deficient mice (BKO) displayed normal mammary ductal structure  
154 (Fig. 2A and fig. S3B) but those of postpartum BKO were largely devoid of alveolar  
155 structure and milk production (Fig. 2B-D). BKO-Rh1-OE mice exhibited a similar degree

156 of alveogenic and lactogenic deficiency (Fig. 2B-D), suggesting that RNase H1  
157 overexpression does not rescue *Brca1*-associated defects in mammary functions.

### 158 **RNase H1 overexpression exacerbates DNA replication stress *in vivo***

159 To examine the impact of BRCA1 and R-loops, alone and together, on DNA replication,  
160 we pulse-labeled mice with bromodeoxyuridine (BrdU) to track cells undergoing DNA  
161 replication. Mammary tissues were immunostained for BrdU, the DSB marker  $\gamma\text{H}_2\text{AX}$ ,  
162 and/or the HDR marker RAD51 (Fig. 3A-C, and fig. S4). As a surrogate marker for DNA  
163 replication stress, we quantified the percentage of  $\gamma\text{H}_2\text{AX}^+$  cells among BrdU<sup>+</sup> mammary  
164 epithelial cells ( $\gamma\text{H}_2\text{AX}^+/\text{BrdU}^+$ ) in non-irradiated animals.

165 As a positive control, we observed a substantial increase in DNA replication stress in  
166 non-irradiated BKO mammary glands versus their wildtype control (Ctrl) counterparts (Fig.  
167 3D, compare columns 1 and 2). This is consistent with the known function of BRCA1 in  
168 the reduction of DNA replication stress. Given that R-loops are recognized as a source of  
169 replication stress and genome instability (Brickner et al. 2022; Petermann et al. 2022), we  
170 had anticipated that R-loop removal by *in vivo* RNase H1 overexpression would alleviate  
171 DNA replication stress. Contrary to our prediction, Rh1-OE mammary glands also  
172 displayed elevated  $\gamma\text{H}_2\text{AX}^+/\text{BrdU}^+$  cells (Fig. 3D, column 3), which seems incongruent with  
173 the notion that R-loops contribute to DNA replication stress. Even more remarkably,  
174 compared to non-irradiated BKO and Rh1-OE mice, mammary epithelium of non-irradiated  
175 BKO-Rh1-OE mice experienced a drastic increase in the number of  $\gamma\text{H}_2\text{AX}^+/\text{BrdU}^+$  cells  
176 (Fig. 3D, compares columns 2 and 3 with 4). This was accompanied by more  
177 RAD51<sup>+</sup>/BrdU<sup>+</sup> cells in non-irradiated BKO-Rh1-OE mice compared to the Ctrl, BKO and  
178 Rh1-OE groups (Fig. 3E, compare columns 1-3 with 4), suggesting that the elevated  
179 replication stress is unlikely due to impaired RAD51 recruitment to stalled replication forks.



180 We infer from these results that R-loop elimination and *Brcal* deletion act concertedly to  
181 accentuate DNA replication stress in proliferating mammary epithelial cells.

182 BRCA1 is known to play an important role in protection of nascent DNA strands at  
183 stalled DNA replication forks (Chen et al. 2018; Venkitaraman 2019). Specifically, a  
184 concerted action of BRCA1, BRCA2 and RAD51 protects a stalled replication fork from  
185 nuclease degradation and subsequent fork collapse (Schlacher et al. 2012; Chaudhuri et al.  
186 2016; Kolinjivadi et al. 2017; Willis et al. 2017). We envision several scenarios whereby  
187 RNase H1 overexpression elevates replication stress in proliferating mammary epithelial  
188 cells. First, overexpressed RNase H1 could remove the small RNA-DNA hybrids formed  
189 during Okazaki fragment synthesis, disrupting normal DNA replication. Second, excessive  
190 R-loop removal may lead to a higher level of under-twisted superhelical stress throughout  
191 the genome (Chedin and Benham 2020). This, in turn, may favor the formation of non-B  
192 DNA structures such as cruciform, slipped structures, triplexes, and G-quadruplexes, which  
193 can impede DNA replication and create DNA sites susceptible to breaks (Bacolla and Wells  
194 2004; Zhao et al. 2010). Lastly, our *in vivo* result could be explained by a potential positive  
195 role of R-loops in resolution of DNA replication stress, although such a scenario would not  
196 be compatible with the published *in vitro* data. More studies are warranted to further  
197 interrogate the R-loop function in DNA replication stress.

198 **RNase H1 overexpression does not significantly affect ionizing radiation (IR)-induced**  
199 **homology-directed repair (HDR) *in vivo***

200 To examine the combined impact of BRCA1 and R-loops on IR-triggered HDR in  
201 mammary epithelium, we first pulse-labeled mice with BrdU and subsequently subjected  
202 them to IR. Mammary tissues were harvested three hours following IR and immunostained  
203 for BrdU,  $\gamma$ H<sub>2</sub>AX, and/or RAD51 (Fig. 3A-C, and fig. S4). We assessed the efficiency of

204 IR-induced HDR by enumerating the percentage of RAD51<sup>+</sup> cells in BrdU<sup>+</sup> mammary  
205 epithelial cells (RAD51<sup>+</sup>/BrdU<sup>+</sup>).

206 As expected, IR-induced  $\gamma$ H<sub>2</sub>AX foci were present in almost all BrdU<sup>+</sup> mammary  
207 epithelial cells in the four mouse cohorts (Fig. 3D, columns 5-8). Consistent with the  
208 established role of BRCA1 in supporting HDR, irradiated BKO mammary glands exhibited  
209 a substantially lower percentage of RAD51<sup>+</sup>/BrdU<sup>+</sup> cells versus Ctrl (Fig. 3E, compare  
210 columns 5 and 6). R-loop attenuation by RNase H1 overexpression did not significantly  
211 affect the RAD51<sup>+</sup>/BrdU<sup>+</sup> percentage in irradiated mammary glands, either with (Rh1-OE)  
212 or without (BKO-Rh1-OE) the functional *Brca1* gene (compare column 5 and 7, 6 and 8 in  
213 Fig. 3E), although there is a trend of reduction in Rh1-OE versus parental Ctrl. Therefore,  
214 our *in vivo* data do not support an indispensable role of R-loops in HDR in mammary  
215 epithelial cells.

216 *In vitro* work suggests that BRCA1 is involved in multiple distinct steps of HDR: it  
217 facilitates 3' end resection and RAD51 filament formation, an early and late step of HDR,  
218 respectively (Sy et al. 2009; Gao et al. 2014; Chen et al. 2018; D'Alessandro et al. 2018;  
219 Venkitaraman 2019). At the face value, our *in vivo* result is not consistent with such an  
220 HDR-promoting activity of R-loops. However, global R-loop removal by overexpressed  
221 RNase H1 may cancel out the HDR-promoting and -impeding activities of R-loops as  
222 previously observed in various model systems (Brickner et al. 2022; Petermann et al. 2022).  
223 In addition, we cannot exclude the possibility that HDR-associated R-loops at DSBs in  
224 mammary epithelial cells may be shielded from the action of overexpressed RNase H1 *in*  
225 *vivo*.

226 **RNase H1 overexpression reshapes *Brca1*-associated tumor subtype without affecting**  
227 **overall tumor incidence**

228 To directly determine the role of R-loops in tumorigenesis, we monitored spontaneous  
229 mammary tumor development in Ctrl, BKO, Rh1-OE, and BKO-Rh1-OE female mice up  
230 to 75 weeks of age. To ensure continuing activation of the hormone-responsive promoter  
231 that drives the expression of the Cre transgene, all mice were mated throughout the entire  
232 duration of the tumor study. Consistent with the published findings (Xu et al. 1999; Zhang  
233 et al. 2017), BKO mice had an increased incidence of spontaneous mammary tumors,  
234 resulting in approximately 50% tumor-related mortality (Fig. 4A, red). In contrast, no  
235 mammary tumors were observed in mice with RNase H1 overexpression alone (Fig. 4A,  
236 green). Tumor incidence of BKO-Rh1-OE mice was indistinguishable from that in BKO  
237 (Fig. 4A, compare red and purple). Thus, despite global R-loop removal in *Brcal*-deficient  
238 mammary epithelium, the overall rate of mammary tumor development remained the same.  
239 This is not concordant with the marked increase in replication stress in BKO-Rh1-OE mice  
240 versus BKO.

241 Given that luminal progenitor cells are the cell of origin of *Brcal*-associated mammary  
242 tumors, we compared via flow cytometry the relative abundance of luminal progenitor cells  
243 in various mouse cohorts. Using CD49b as the established luminal progenitor marker  
244 (Shehata et al. 2012)(fig. S2A), we observed an increased luminal progenitor cell population  
245 in BKO versus Ctrl animals (Fig. 4B), which is consistent with the previous findings from  
246 us and others (Lim et al. 2009; Nair et al. 2016; Chiang et al. 2019). Intriguingly, RNase H1  
247 overexpression in *Brcal*-deleted mammary glands (BKO-Rh1-OE) resulted in an  
248 appreciable shift from CD49b<sup>+</sup> luminal progenitor to CD49b<sup>-</sup> mature luminal cell  
249 populations, rendering the relative abundance of these two cell populations similar to what  
250 was observed in the Ctrl animals (Fig. 4B). Accordingly, while all mammary tumors from  
251 the BKO cohort were ER $\alpha$ <sup>-</sup>, a significant percentage of *Brcal*-associated mammary tumors  
252 with RNase H1 overexpression from the BKO-Rh1-OE cohort expressed ER $\alpha$  (Fig. 4C, fig.

253 S5A and Table S1). These results suggest that R-loop removal may influence the *Brcal*-  
254 associated tumor subtype by reshaping the differentiation status of the cell of origin for  
255 *Brcal*-associated malignant transformation (Fig. 4D).

256 The aforementioned findings are consistent with our previously published *in vitro* work,  
257 which points to a role of R-loops in suppression of ER $\alpha$ -encoding *ESR1* transcription and  
258 impediment of luminal cell differentiation (Chiang et al. 2019). In particular, we found that  
259 *in vitro* RNase H1 overexpression in primary breast cells isolated from human *BRCA1*  
260 mutation carriers promotes the transition from luminal progenitor cells to mature luminal  
261 cells (Chiang et al. 2019). Thus, instead of directly promoting tumorigenesis, *Brcal*-  
262 associated R-loop accumulation likely contributes to luminal differentiation blockage and  
263 aberrant expansion of the luminal progenitor cell population in *Brcal*-deficient mammary  
264 glands. RNase H1 overexpression alleviates this differentiation roadblock and gives rise to  
265 more *Brcal*-deficient mature luminal cells, which, due to elevated genome instability, can  
266 undergo further oncogenic transformation into ER $\alpha^+$  tumors (Fig. 4D). Our findings provide  
267 *in vivo* evidence for a previously unappreciated role of R-loop dynamics on tumor  
268 development in mammary epithelium.

269 We envision that the conditional transgenic mouse model for RNase H1 overexpression  
270 provides a useful tool for probing the physiological impact of R-loop dynamics in other  
271 tissues and cell types. However, we also note several technical caveats and limitations of  
272 this transgenic model. First, a pattern of heterogeneous RNase H1 overexpression was  
273 observed in different mammary tumors from BKO-Rh1-OE mice (fig. S5B and table S1).  
274 In addition, given the myriad functions of R-loops in DNA transactions, global RNase H1  
275 overexpression can reduce both beneficial and deleterious R-loops, thus complicating the  
276 interpretation of the corresponding *in vivo* phenotypes. Lastly, excessive RNase H1 may

277 also give rise to “off-targeting” effects independent of R-loop removal. Despite these  
278 caveats, our current work fills an important gap in the knowledge of the pathophysiological  
279 roles of R-loops. By challenging the prevailing paradigm concerning the molecular  
280 functions of R-loops, our *in vivo* findings call for a more direct and rigorous examination of  
281 the presumed causal relationship between R-loops and tumorigenesis.

## 283 **Materials and Methods**

### 284 **Mice**

285 *Brca1<sup>ff</sup>* and *MMTV-Cre* line A mice have been described previously (Zhang et al.,  
286 2017). *Rnaseh1<sup>Tg</sup>* conditional knockin mice were generated by CRISPR-based gene editing  
287 (Cyagen Biosciences). Briefly, the “CAG-*loxP*-Stop-*loxP*-mouse *Rnaseh1* cDNA-polyA”  
288 cassette was cloned into intron 1 of *Rosa26* in reverse direction. *Cas9* protein and gRNA  
289 were co-injected with donor vector into fertilized mouse eggs to generate the targeted  
290 knockin offspring. F0 founder animals, identified by PCR and subsequent sequence  
291 analysis, were bred to WT mice and assessed for germline transmission and F1 mouse  
292 generation. *MMTV-Cre* mice were used to generate *MMTV-Cre* (Ctrl), *MMTV-Cre*, *Brca1<sup>ff</sup>*  
293 (BKO), *MMTV-Cre*, *Rnaseh1<sup>Tg/+</sup>* (Rh1-OE) and *MMTV-Cre*, *Brca1<sup>ff</sup>*, *Rnaseh1<sup>Tg/+</sup>* (BKO-  
294 Rh1-OE) mice. All mutant mice and their littermate controls were in a similarly mixed  
295 genetic background (129SvEv/SvJae/C57BL6/FVB). Genotyping primers information can  
296 be found in table S2. All procedures performed on animals were approved by the  
297 Institutional Animal Care and Use Committee at the George Washington University.

## 298 **Whole mount and immunohistochemistry staining**

299 Inguinal mammary glands from mice of the indicated age were used for whole-mount  
300 staining as described previously (Nair et al., 2016). In brief, inguinal fat pads were isolated  
301 and spread onto a slide. Glands were fixed in Carnoy's fixative overnight at room  
302 temperature. Glands were rehydrated in descending grades of ethanol (100, 70, 50 and 30%)  
303 for 15 min each, then washed with distilled water twice before overnight staining in Carmine  
304 alum solution (0.2% carmine and 0.5% aluminum potassium sulfate). Stained glands were  
305 dehydrated in ascending grades of alcohol (70, 70, 90, 95, 100 and 100%) for 15 min each,  
306 and put in CitriSolv reagent (Fisher, 22-143975) for tissue clearing. Samples were covered  
307 with sufficient Permount (Electron Microscopy Sciences, 1798605) for mounting. Samples  
308 were examined under a Nikon SMZ1000 dissection microscope. Duct length was measured  
309 from calibrated images using Eclipse software. Ductal fill percentage was calculated by the  
310 average length of three longest ducts originating from the nipple region divided by the  
311 overall fat pad length of each animal. Each dot represents a mammary fat pad from  
312 individual animals of a given genotype.

313 Mammary glands or mammary tumors were formalin-fixed overnight at 4 °C and paraffin  
314 embedded (FFPE). Sections of 3 µM in thickness were used for hematoxylin–eosin (H&E)  
315 staining, immunohistochemistry (IHC), and immunofluorescent (IF) staining. Sections were  
316 baked at 70 °C for 10 min, then de-paraffinized and dehydrated by xylene twice, and  
317 descending grade of ethanol (100 100, 95, 70 and 50%). Samples were washed briefly with  
318 PBS before transferring to boiling antigen-unmasking solution (Vector Labs, H-3300) for  
319 20 min. For IHC, sections were pre-treated with 3% hydrogen peroxide for 10 min before  
320 blocking (10% normal goat serum in PBS) for 1 hr at room temperature. Samples were  
321 incubated with primary antibody in blocking buffer overnight at 4 °C. The ABC peroxidase

322 detection system (Vector Labs, PK-6105) was used with 3, 3'-diaminobenzidine (DAB)  
323 (Vector Labs, SK-4105) as substrate according to the manufacturer's instruction. Primary  
324 antibodies used were anti-RNase H1 (Proteintech, 15606-1-AP, 1:1000), anti-milk protein  
325 (Nordic Immunology, RAM/MSP, 1:10,000), and anti-ER $\alpha$  (Santa Cruz, sc-542, 1:500)

### 326 **R-loop IF staining**

327 Freshly cut 3  $\mu$ M FFPE samples were baked at 70 °C for 15 min. After de-paraffin and  
328 rehydration, samples were treated with boiling antigen-unmasking solution for 1 h. Samples  
329 were cooled down to room temperature, and then treated with 0.2  $\times$  SSC buffer (Ambion,  
330 AM9763) with gentle shaking at room temperature for 20 min. Samples were then incubated  
331 in a staining buffer (TBST with 0.1% BSA) for 10 min with rocking. Enzymatic treatments  
332 were done in staining buffer supplemented with 3 mM magnesium chloride with 1:200  
333 dilutions of RNase T1 (Thermo Fisher Scientific, EN0541), ShortCut RNase III (New  
334 England Biolabs, M0245S), and/or RNase H (New England Biolabs, M0297S) and  
335 incubated with rocking for 1 hr. Samples were subsequently washed by incubating with  
336 staining buffer for 10 min with rocking. Primary antibody incubation was done with  
337 monoclonal antibody S9.6 (Karafast, ENH001) at 1:100 dilution in PBS containing 1%  
338 normal goat serum and 0.5% Tween-20 at 37 °C overnight. After primary antibody  
339 incubation, samples were washed three times with PBS containing 0.5% Tween-20, and  
340 then incubated with Alexa-488-conjugated secondary antibody at 1:1,000 dilution in PBS  
341 containing 1% normal goat serum and 0.5% Tween-20 at 37 °C for 2 hr. Samples were  
342 washed twice with PBS containing 0.5% Tween-20, twice with PBS, and then mounted with  
343 ProLong<sup>TM</sup> Gold Antifade Mountant with DAPI (Invitrogen, P36931). For each experiment,  
344 all samples were prepared, treated, and stained in parallel from one master enzyme,  
345 antibody, and/or dye dilution to ensure uniform treatment and staining efficiencies. R-loop

346 intensity was quantified using the MetaMorph Microscopy Automation and Image Analysis  
347 Software 7.8 as previously described (Zhang et al., 2017).

### 348 ***In vivo* BrdU labeling and IF staining**

349 For BrdU/RAD51 and BrdU/ $\gamma$ H<sub>2</sub>AX double staining after IR, mice were first labeled with  
350 BrdU *in vivo*. Mice were intraperitoneally injected with cell proliferation labelling reagent  
351 (GE Healthcare, RPN201) at 16.7 ml kg<sup>-1</sup> and then Gamma irradiated at 20 Gy. Three hours  
352 later, mammary glands were harvested for FFPE sectioning and IF staining. 3  $\mu$ M sample  
353 sections were baked, de-paraffinized, rehydrated, and treated with boiling antigen-  
354 unmasking solution for 20 min. After cooling down, samples were washed with PBS 3 times  
355 and treated with 0.2% Triton X-100 for 30 min at room temperature. Samples were washed  
356 3 times with PBS before putting in a blocking buffer for at least 1 hr. Samples were  
357 incubated with primary antibodies in blocking buffer overnight at 4 °C. Primary antibodies  
358 used were anti-BrdU (GE Healthcare, RPN20, 1:10,000), anti- $\gamma$ H<sub>2</sub>AX (Cell Signaling,  
359 9718, 1:500), and anti-RAD51 (Santa Cruz, sc-8349, 1:100). The next day, sections were  
360 incubated with Alexa-488 and Alexa-546-conjugated secondary antibodies (Invitrogen,  
361 A32731 and A11126), mounted with ProLong™ Gold Antifade Mountant with DAPI, and  
362 examined with a Zeiss Spinning Disk Confocal Microscope.

### 363 **Flow cytometry and cell sorting**

364 Thoracic and inguinal mammary glands from virgin mice were isolated in a sterile condition  
365 and lymph nodes from inguinal glands were removed. Single cells were prepared as  
366 previously described (Nair et al. 2016). Briefly, isolated glands were minced and digested  
367 for 16-20 hr at 37 °C in DMEM F-12 (StemCell Technologies, 36254) containing 2% fetal  
368 bovine serum (FBS), insulin (5 mg/mL), penicillin–streptomycin and 10%



369 gentle collagenase/hyaluronidase (StemCell Technologies, 07919). After vortexing,  
370 epithelial organoids were pelleted at 600g for 5 min. Red blood cells (RBCs) were lysed  
371 with 0.8% ammonium chloride solution (StemCell Technologies, 07850). Epithelial  
372 organoids were further digested by 0.05% pre-warmed Trypsin (Life Technologies, 25300),  
373 washed in ice-cold Hanks Balanced Salt Solution (StemCell Technologies, 37150) with 2%  
374 FBS (HF), and resuspended in 5 U/mL dispase (StemCell Technologies, 07913) with  
375 0.1 mg/mL DNase I (Sigma-Aldrich, D4513). Single cells were obtained by filtering the cell  
376 suspension through a 40- $\mu$ m cell strainer (Fisher, 22363547). Cells were counted and  
377 resuspended in HF at a concentration of  $1 \times 10^6$  cells per 100  $\mu$ l for staining. Cell were first  
378 blocked with 10% rat serum (Jackson Laboratories, 012-000-120) for 10 min followed by  
379 incubation with cell-surface antibody cocktails for 20 min at 4 °C. The following cell-  
380 surface markers were used in the experiment: EpCAM-PE (BioLegend, 118206, 1:200),  
381 CD49f-FITC (BD Biosciences, 555735, 1:50), CD31-Biotin (BD Bioscience, 553371,  
382 1:100), CD45-Biotin (BioLegend, 103103, 1:100), TER119-Biotin (BioLegend, 103511,  
383 1:100), and CD49b-Alexa Fluor 647 (BioLegend, 104317, 1:200) followed by Streptavidin-  
384 Pacific Blue (Invitrogen, S11222, 1:200) incubation. 7-AAD (BD Biosciences, 559925,  
385 1:20) was added 10 min before analysis. CD49b<sup>+</sup> cells were gated using a fluorescent-  
386 minus-one control, in which all antibodies except CD49b-Alexa 647 were used. Flow  
387 cytometry was performed with a BD Celesta Cell Analyzer and sorting was performed with  
388 a BD Influx Cell Sorter. Data were analyzed using FlowJo software. Purity of the stromal,  
389 luminal, and basal populations were verified by RT-PCR analysis of *Vimentin* (stromal),  
390 *K18* (luminal), and *K14* (basal) mRNA. All primers information can be found in table S2.

### 391 **Statistical analysis**

392 Data analysis and statistics were done using GraphPad Prism 8 software. Mean difference  
393 comparison from two groups using unpaired student *t*-test was used throughout the  
394 experiments. Data in bar and dot graphs are means  $\pm$  s.e.m.  $P < 0.05$  was considered  
395 statistically significant.

### 396 **Data and materials availability**

397 All data needed to evaluate the conclusions in the paper are present in the paper and the  
398 Supplementary Materials. Model demonstration is created with BioRender.com.

399

### 400 **Competing interests**

401 The authors declare that they have no competing interests.

402

### 403 **Acknowledgments**

404 We thank Madeleine Prevost, Shannen Ubalde, and Yimeng Huang for technical support.

### 405 **Author contributions**

406 R.L. and Y.H. conceived, managed, and oversaw the overall project. R.L. and H-C.C.  
407 wrote the manuscript. H-C.C., L.Q., and P.M. carried out the experiments. H-C.C., L.Q.,  
408 P.M., Y.H., and R.L. analyzed the data.

409

410

### 411 **Funding**

412 The work was supported by the following funding sources.

413 National Institutes of Health grants R01CA282303 (R.L. and Y.H.), R01CA220578 (R.L.),  
414 and R01CA212674 (Y.H.)

415

416

417

418

419 **References**

420

421 Aguilera A, Garcia-Muse T. 2012. R loops: from transcription byproducts to threats to genome  
422 stability. *Mol Cell* **46**: 115-124.

423 Bacolla A, Wells RD. 2004. Non-B DNA conformations, genomic rearrangements, and human  
424 disease. *J Biol Chem* **279**: 47411-47414.

425 Bhatia V, Barroso SI, Garcia-Rubio ML, Tumini E, Herrera-Moyano E, Aguilera A. 2014. BRCA2  
426 prevents R-loop accumulation and associates with TREX-2 mRNA export factor PCID2.  
427 *Nature* **511**: 362-365.

428 Boguslawski SJ, Smith DE, Michalak MA, Mickelson KE, Yehle CO, Patterson WL, Carrico RJ.  
429 1986. Characterization of monoclonal antibody to DNA:RNA and its application to  
430 immunodetection of hybrids. *J Immunol Methods* **89**: 123-130.

431 Boque-Sastre R, Soler M, Oliveira-Mateos C, Portela A, Moutinho C, Sayols S, Villanueva A,  
432 Esteller M, Guil S. 2015. Head-to-head antisense transcription and R-loop formation  
433 promotes transcriptional activation. *Proc Natl Acad Sci U S A* **112**: 5785-5790.

434 Brickner JR, Garzon JL, Cimprich KA. 2022. Walking a tightrope: The complex balancing act of  
435 R-loops in genome stability. *Mol Cell* **82**: 2267-2297.

436 Cerritelli SM, Crouch RJ. 2009. Ribonuclease H: the enzymes in eukaryotes. *FEBS J* **276**: 1494-  
437 1505.

438 Chaudhuri AR, Callen E, Ding X, Gogola E, Duarte AA, Lee JE, Wong N, Lafarga V, Calvo JA,  
439 Panzarino NJ et al. 2016. Replication fork stability confers chemoresistance in BRCA-  
440 deficient cells. *Nature* **535**: 382-387.

441 Chedin F, Benham CJ. 2020. Emerging roles for R-loop structures in the management of  
442 topological stress. *J Biol Chem* **295**: 4684-4695.

443 Chen CC, Feng W, Lim PX, Kass EM, Jasin M. 2018. Homology-Directed Repair and the Role of  
444 BRCA1, BRCA2, and Related Proteins in Genome Integrity and Cancer. *Annu Rev Cancer*  
445 *Biol* **2**: 313-336.

446 Chiang HC, Zhang X, Li J, Zhao X, Chen J, Wang HT, Jatoi I, Brenner A, Hu Y, Li R. 2019.  
447 BRCA1-associated R-loop affects transcription and differentiation in breast luminal  
448 epithelial cells. *Nucleic Acids Res* **47**: 5086-5099.

449 D'Alessandro G, Whelan DR, Howard SM, Vitelli V, Renaudin X, Adamowicz M, Iannelli F,  
450 Jones-Weinert CW, Lee M, Matti V et al. 2018. BRCA2 controls DNA:RNA hybrid level  
451 at DSBs by mediating RNase H2 recruitment. *Nat Commun* **9**: 5376.

452 Gao M, Wei W, Li MM, Wu YS, Ba Z, Jin KX, Li MM, Liao YQ, Adhikari S, Chong Z et al. 2014.  
453 Ago2 facilitates Rad51 recruitment and DNA double-strand break repair by homologous  
454 recombination. *Cell Res* **24**: 532-541.

- 455 Grunseich C, Wang IX, Watts JA, Burdick JT, Guber RD, Zhu Z, Bruzel A, Lanman T, Chen K,  
456 Schindler AB et al. 2018. Senataxin Mutation Reveals How R-Loops Promote Transcription  
457 by Blocking DNA Methylation at Gene Promoters. *Mol Cell* **69**: 426-437 e427.
- 458 Hatchi E, Skourti-Stathaki K, Ventz S, Pinello L, Yen A, Kamieniarz-Gdula K, Dimitrov S,  
459 Pathania S, McKinney KM, Eaton ML et al. 2015. BRCA1 Recruitment to Transcriptional  
460 Pause Sites Is Required for R-Loop-Driven DNA Damage Repair. *Mol Cell* **57**: 636-647.
- 461 Jinek M, Chylinski K, Fonfara I, Hauer M, Doudna JA, Charpentier E. 2012. A programmable dual-  
462 RNA-guided DNA endonuclease in adaptive bacterial immunity. *Science* **337**: 816-821.
- 463 Kolinjivadi AM, Sannino V, De Antoni A, Zadorozhny K, Kilkenny M, Techer H, Baldi G, Shen  
464 R, Ciccia A, Pellegrini L et al. 2017. Smarcal1-Mediated Fork Reversal Triggers Mre11-  
465 Dependent Degradation of Nascent DNA in the Absence of Brca2 and Stable Rad51  
466 Nucleofilaments. *Mol Cell* **67**: 867-881 e867.
- 467 Kuchenbaecker KB, Hopper JL, Barnes DR, Phillips KA, Mooij TM, Roos-Blom MJ, Jervis S, van  
468 Leeuwen FE, Milne RL, Andrieu N et al. 2017. Risks of Breast, Ovarian, and Contralateral  
469 Breast Cancer for BRCA1 and BRCA2 Mutation Carriers. *JAMA* **317**: 2402-2416.
- 470 Lim E, Vaillant F, Wu D, Forrest NC, Pal B, Hart AH, Asselin-Labat ML, Gyorki DE, Ward T,  
471 Partanen A et al. 2009. Aberrant luminal progenitors as the candidate target population for  
472 basal tumor development in BRCA1 mutation carriers. *Nat Med* **15**: 907-913.
- 473 Molyneux G, Geyer FC, Magnay FA, McCarthy A, Kendrick H, Natrajan R, Mackay A, Grigoriadis  
474 A, Tutt A, Ashworth A et al. 2010. BRCA1 basal-like breast cancers originate from luminal  
475 epithelial progenitors and not from basal stem cells. *Cell Stem Cell* **7**: 403-417.
- 476 Nair SJ, Zhang X, Chiang HC, Jahid MJ, Wang Y, Garza P, April C, Salathia N, Banerjee T, Alenazi  
477 FS et al. 2016. Genetic suppression reveals DNA repair-independent antagonism between  
478 BRCA1 and COBRA1 in mammary gland development. *Nat Commun* **7**: 10913.
- 479 Nolan E, Lindeman GJ, Visvader JE. 2017. Out-RANKing BRCA1 in Mutation Carriers. *Cancer*  
480 *Res* **77**: 595-600.
- 481 Ohle C, Tesorero R, Schermann G, Dobrev N, Sinning I, Fischer T. 2016. Transient RNA-DNA  
482 Hybrids Are Required for Efficient Double-Strand Break Repair. *Cell* **167**: 1001-1013  
483 e1007.
- 484 Ouyang J, Yadav T, Zhang JM, Yang H, Rheinbay E, Guo H, Haber DA, Lan L, Zou L. 2021. RNA  
485 transcripts stimulate homologous recombination by forming DR-loops. *Nature* **594**: 283-  
486 288.
- 487 Petermann E, Lan L, Zou L. 2022. Sources, resolution and physiological relevance of R-loops and  
488 RNA-DNA hybrids. *Nat Rev Mol Cell Biol* **23**: 521-540.
- 489 Proia TA, Keller PJ, Gupta PB, Klebba I, Jones AD, Sedic M, Gilmore H, Tung N, Naber SP,  
490 Schnitt S et al. 2011. Genetic predisposition directs breast cancer phenotype by dictating  
491 progenitor cell fate. *Cell Stem Cell* **8**: 149-163.
- 492 Schlacher K, Wu H, Jasin M. 2012. A distinct replication fork protection pathway connects Fanconi  
493 anemia tumor suppressors to RAD51-BRCA1/2. *Cancer Cell* **22**: 106-116.

- 494 Shehata M, Teschendorff A, Sharp G, Novcic N, Russell IA, Avril S, Prater M, Eirew P, Caldas C,  
495 Watson CJ et al. 2012. Phenotypic and functional characterisation of the luminal cell  
496 hierarchy of the mammary gland. *Breast Cancer Res* **14**: R134.
- 497 Skourti-Stathaki K, Proudfoot NJ. 2014. A double-edged sword: R loops as threats to genome  
498 integrity and powerful regulators of gene expression. *Genes Dev* **28**: 1384-1396.
- 499 Smolka JA, Sanz LA, Hartono SR, Chedin F. 2021. Recognition of RNA by the S9.6 antibody  
500 creates pervasive artifacts when imaging RNA:DNA hybrids. *J Cell Biol* **220**.
- 501 Sy SM, Huen MS, Chen J. 2009. PALB2 is an integral component of the BRCA complex required  
502 for homologous recombination repair. *Proc Natl Acad Sci U S A* **106**: 7155-7160.
- 503 Venkitaraman AR. 2019. How do mutations affecting the breast cancer genes BRCA1 and BRCA2  
504 cause cancer susceptibility? *DNA Repair (Amst)* **81**: 102668.
- 505 Visvader JE, Stingl J. 2014. Mammary stem cells and the differentiation hierarchy: current status  
506 and perspectives. *Genes Dev* **28**: 1143-1158.
- 507 Wagner KU, Wall RJ, St-Onge L, Gruss P, Wynshaw-Boris A, Garrett L, Li M, Furth PA,  
508 Hennighausen L. 1997. Cre-mediated gene deletion in the mammary gland. *Nucleic Acids  
509 Res* **25**: 4323-4330.
- 510 Willis NA, Frock RL, Menghi F, Duffey EE, Panday A, Camacho V, Hasty EP, Liu ET, Alt FW,  
511 Scully R. 2017. Mechanism of tandem duplication formation in BRCA1-mutant cells.  
512 *Nature* **551**: 590-595.
- 513 Xu X, Wagner K-U, Larson D, Weaver Z, Li C, Reid T, Hennighausen L, Wynshaw-Boris A, Deng  
514 C-X. 1999. Conditional mutation of Brca1 in mammary epithelial cells results in blunted  
515 ductal morphogenesis and tumour formation. *Nature Genetics* **22**: 37-43.
- 516 Yang J, Qi L, Chiang HC, Yuan B, Li R, Hu Y. 2021. BRCA1 Antibodies Matter. *Int J Biol Sci* **17**:  
517 3239-3254.
- 518 Yu K, Chedin F, Hsieh CL, Wilson TE, Lieber MR. 2003. R-loops at immunoglobulin class switch  
519 regions in the chromosomes of stimulated B cells. *Nat Immunol* **4**: 442-451.
- 520 Zhang X, Chiang H-C, Wang Y, Zhang C, Smith S, Zhao X, Nair S, Michalek J, Jatoi I, Lautner M  
521 et al. 2017. Attenuation of RNA Polymerase II Pausing Mitigates BRCA1-Associated R-  
522 loop Accumulation and Tumorigenesis. *Nat Commun* **8**: 15908.
- 523 Zhao J, Bacolla A, Wang G, Vasquez KM. 2010. Non-B DNA structure-induced genetic instability  
524 and evolution. *Cell Mol Life Sci* **67**: 43-62.

525

526

527

## 528 **Figures and Tables**

529

530  
531

### Chiang\_Fig1.

A.

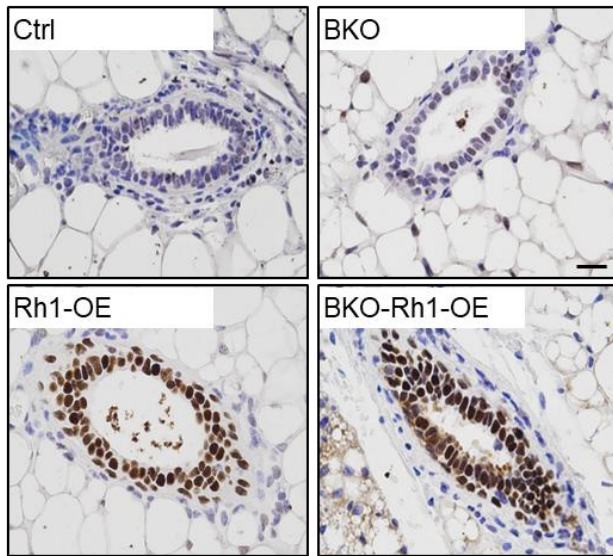

B.

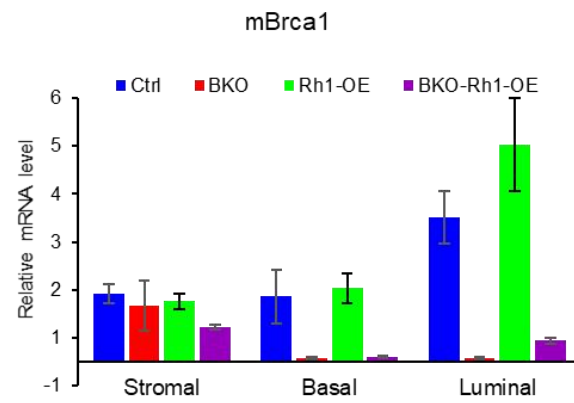

C.

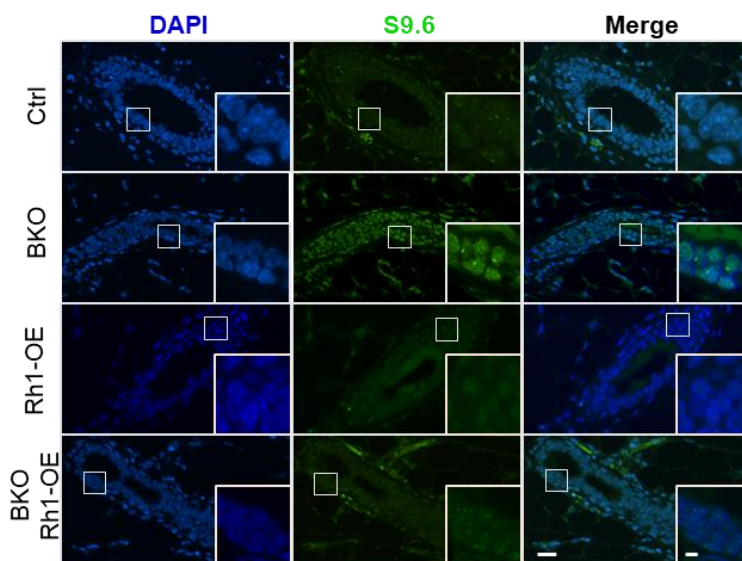

D.

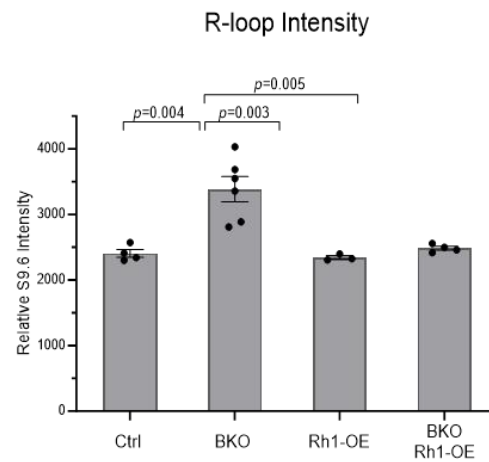

532



533 **Figure. 1. RNase H1 overexpression in the mouse mammary gland can reduce R-loop**  
534 **signal *in vivo*** (A) RNase H1 immunohistochemistry analysis in the mammary glands of 8-  
535 week virgin mice. Representative results from at least 4 sets of animals. Scale bar = 20 $\mu$ M.  
536 (B) mRNA analysis of *Brcal* using sorted stromal, basal and luminal cells. The numbers of  
537 animals used are: Ctrl = 4, BKO = 3, Rh1-OE = 3, BKO-Rh1-OE = 3. Error bars represent  
538 s.e.m. (C) Low and high (inlet) magnification IF images of R-loop staining in the mammary  
539 ducts of 8-week-old virgin mice. Scale bars, 50  $\mu$ m and 10  $\mu$ m (inlet). (D) Quantitation of  
540 the relative R-loop intensity in 8-week-old animals. The number of animals used in each  
541 group is: Ctrl=4, BKO=6, Rh1-OE=3, and BKO-Rh1-OE=4. Statistical analysis was  
542 performed using two-tailed *t*-test. *P* value are indicated. Error bars represent s.e.m.  
543

Chiang\_Fig2.

544  
545  
546  
547  
548  
549  
550  
551  
552  
553  
554  
555  
556  
557  
558  
559  
560  
561  
562  
563  
564  
565  
566  
567  
568  
569  
570  
571  
572  
573  
574  
575  
576  
577  
578  
579  
580  
581  
582  
583  
584  
585  
586  
587  
588  
589  
590  
591  
592  
593  
594  
595

A.

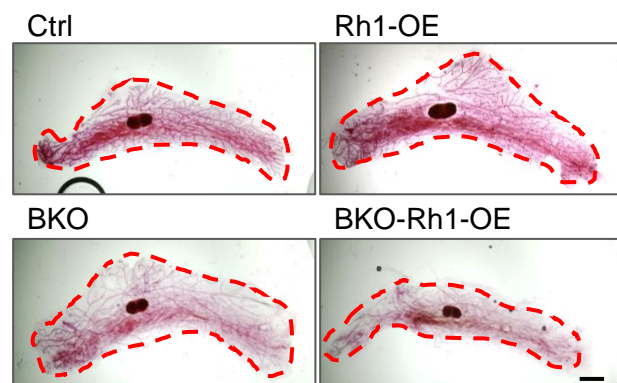

B.

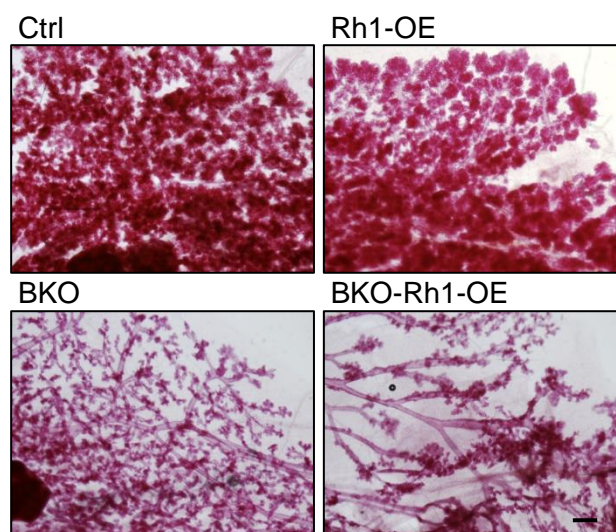

C.

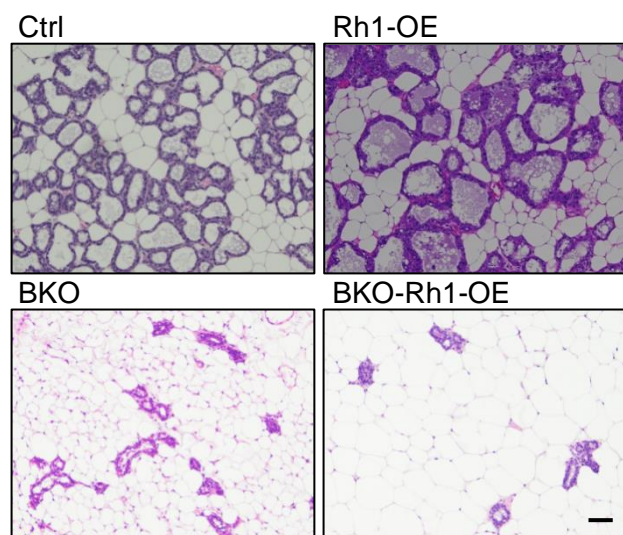

D.

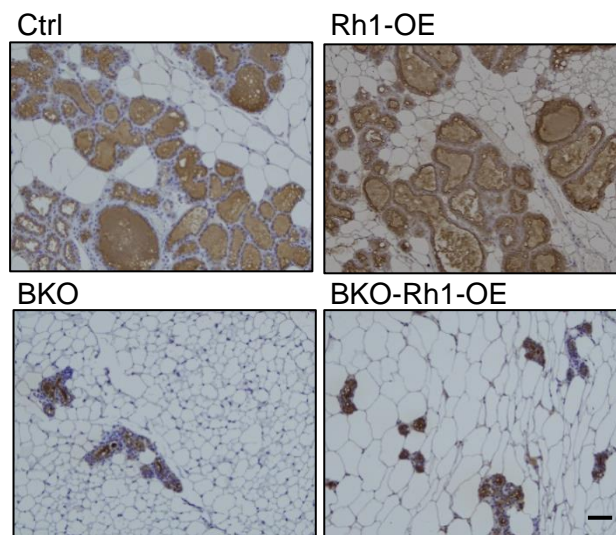

**Figure 2. RNase H1 overexpression cannot rescue the *Brcal*-associated deficiency in alveologenesis and lactogenesis.** (A) Whole mounts of the mammary glands from 8-week virgin mice. The red dash line highlights the boundary of the ductal area. Scale bars = 2 mm. (B) Whole mounts of the mammary glands from 16 to 20-week mice 1-day postpartum. Scale bar= 0.5 mm (C) H&E staining of the lobular-alveolar structure in mammary glands of 16–20-week mice 1-day postpartum. Scale bar= 50 μm. (d) IHC for total milk proteins in mammary glands of 16–20-week mice 1-day postpartum. Scale bar= 50 μm. Images in this figure are representatives of at least 4 animals in each genotype.



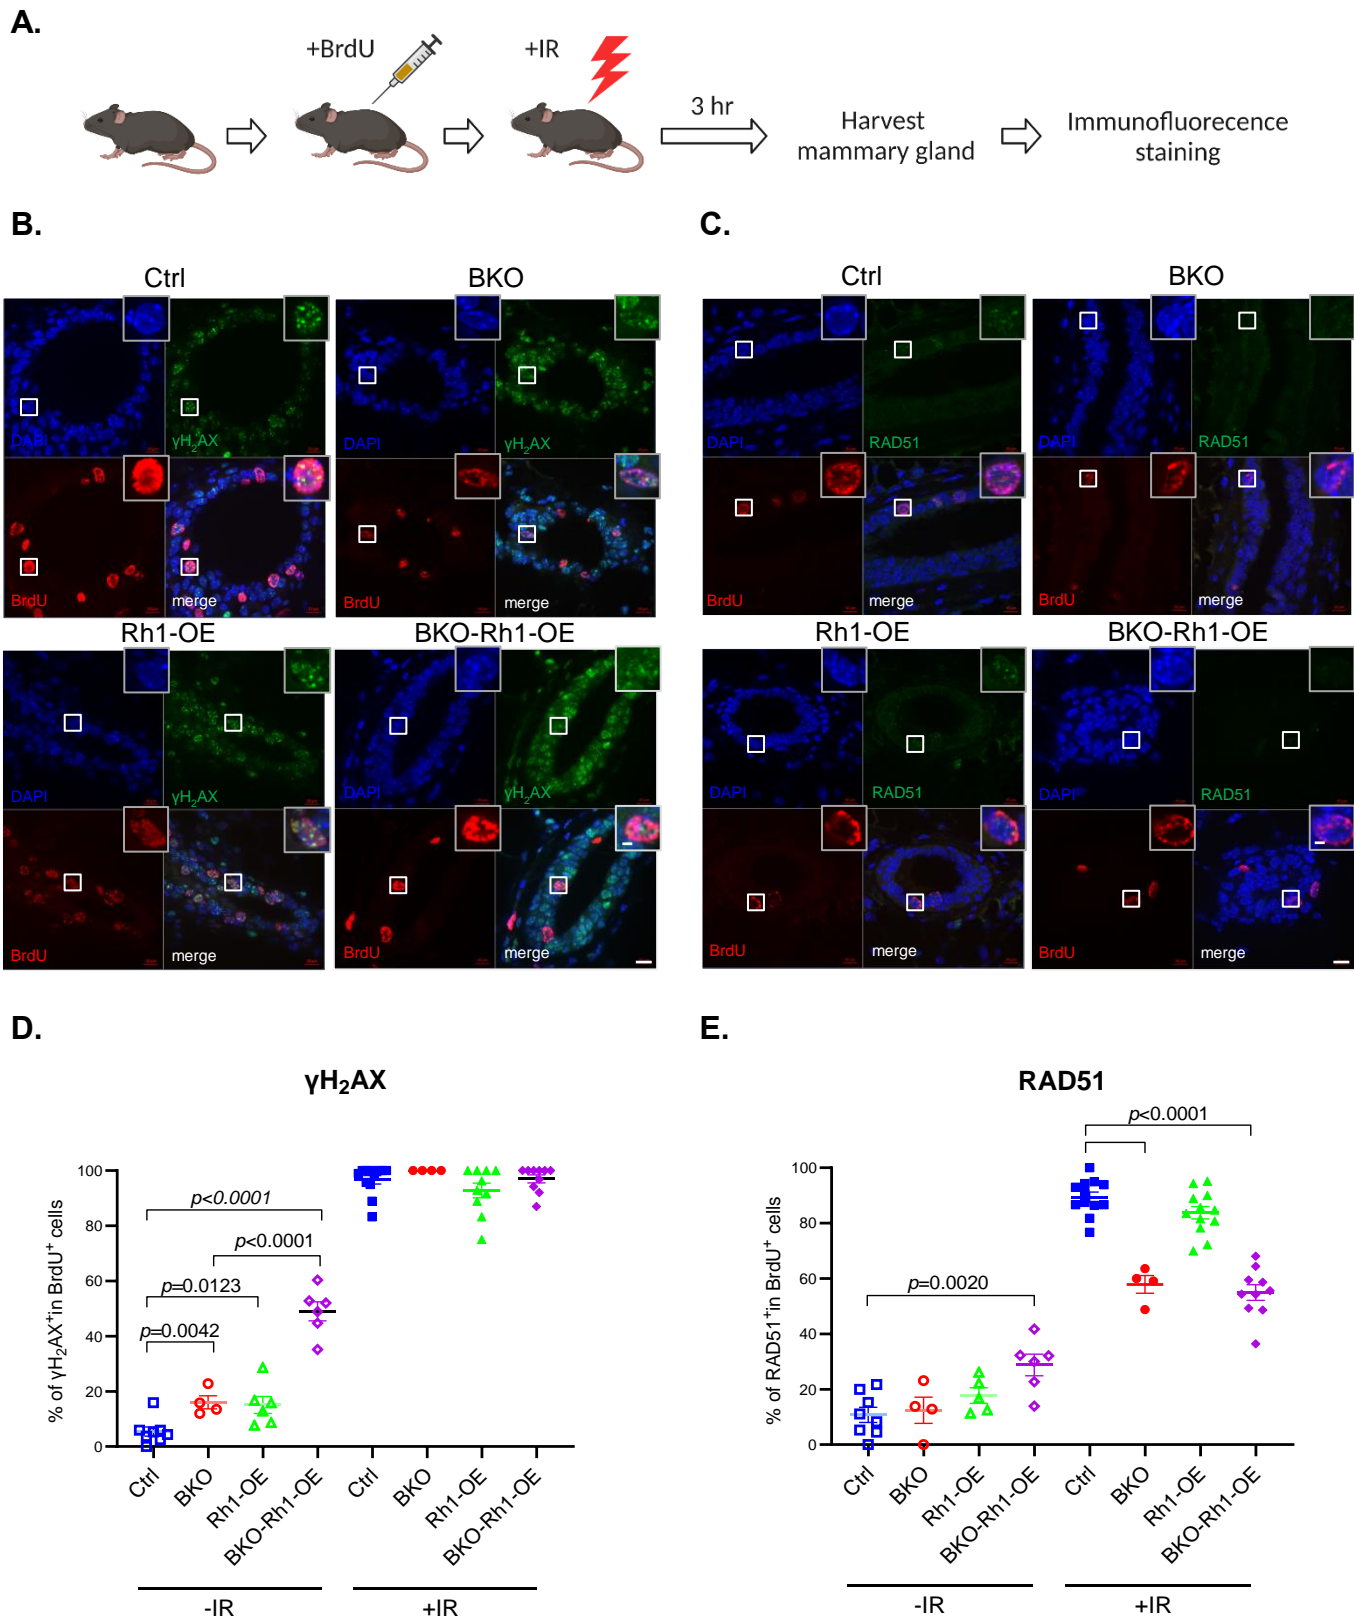

598  
599  
600  
601  
602  
603  
604  
605  
606  
607  
608  
609

**Figure 3. RNase H1 overexpression contributes to elevated replication stress without affecting IR-induced HDR.** (A) Schematic illustration of the experiment setup for BrdU/ $\gamma$ H<sub>2</sub>AX/RAD51 detection *in vivo*. (B) Low and high magnification (inlet) IF images of  $\gamma$ H<sub>2</sub>AX and BrdU staining in the mammary ducts of 8-week-old virgin mice. Scale bars, 10  $\mu$ m and 2  $\mu$ m (inlet). (C) Low and high magnification (inlet) IF images of RAD51 and BrdU staining in the mammary ducts of 8-week-old virgin mice. Scale bars, 10  $\mu$ m and 2  $\mu$ m (inlet). (D) Quantification of  $\gamma$ H<sub>2</sub>AX<sup>+</sup>/BrdU<sup>+</sup> epithelial cells in the mammary gland. Each dot represents a mammary gland. Statistical analysis was performed using two-tailed *t*-test. *P* value are indicated. Error bars represent s.e.m. (E) Quantification of RAD51<sup>+</sup>/BrdU<sup>+</sup> epithelial cells in the mammary glands. Each dot represents a mammary gland. Statistical analysis was performed using two-tailed *t*-test. *P* value are indicated. Error bars represent s.e.m.

Chiang\_Fig4.

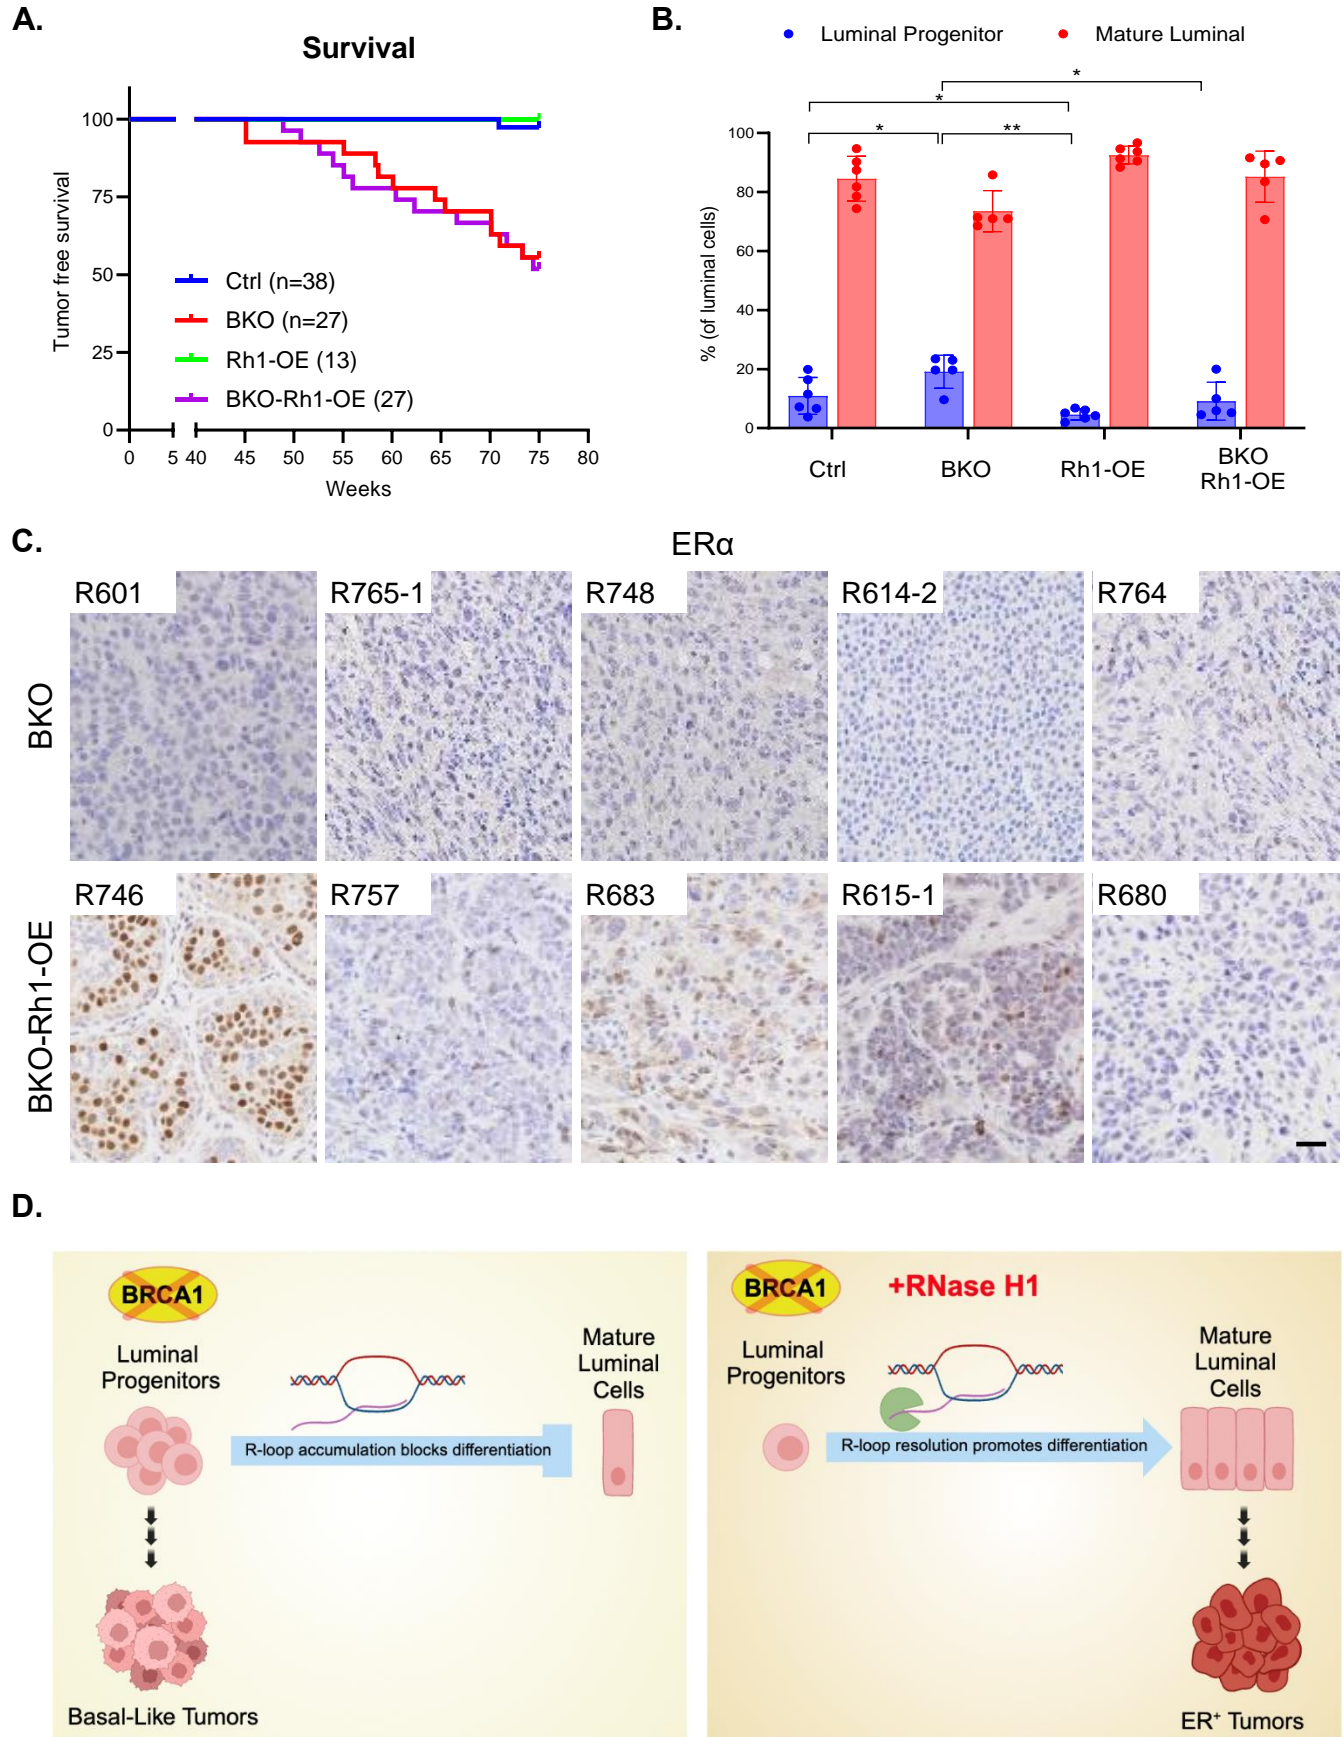

612 **Figure 4. RNase H1 overexpression does not affect *Brcal*-associated tumor incidence**  
613 **but changes tumor subtype. (A)** Kaplan-Meier curve for mammary tumor incidence. **(B)**  
614 Flow cytometry analysis of luminal progenitor and mature luminal cell percentages in 8-10  
615 weeks mice. The numbers of animals used are: Ctrl = 6, BKO = 5, Rh1-OE = 5, BKO-Rh1-  
616 OE = 5. \* $P < 0.05$ , \*\* $P < 0.01$  by Student's  $t$ -test. Error bars represent s.e.m. **(C)**  
617 Representative images of ER $\alpha$  IHC in spontaneous mammary tumors. Each image  
618 represents an individual tumor. Scale bar = 50  $\mu$ m. **(D)** Proposed model for the role of R-  
619 loops in *Brcal*-associated tumorigenesis.

620

621

622

623
